# Supplementary material
Source: PubMed Central journal article supplement (PMC4739127)
Supplement: Supp_Data.pdf [file Supp_Data.pdf]

## Supplementary Data

### LIST OF HIGH-RISK COMORBIDITIES AND ICD-9 CM CODES

- For diabetes mellitus only: polycystic ovaries (ICD-9-CM: 256.4)
- For diabetes mellitus only: steroid induced (ICD-9-CM: 962.0)
- For diabetes mellitus only: gestational diabetes (ICD-9-CM: 648.8)
- Members diagnosed with AIDS (ICD-9-CM codes: 042, V08)
- Pregnancy (ICD-9-CM codes: 640.xx to 677.xx)
- HF due to severe primary valvular disease (ICD-9-CM codes: 394.x, 395.x, 396.x, 397.x)
- Unstable angina pectoris (ICD-9-CM codes: 411.1)
- Heart and lung transplant patients (ICD-9-CM codes: 33.5, 33.6)

With only ICD-9-CM codes 140.xx–208.xx as the primary diagnosis code:

- Any beneficiary with one or more inpatient claims, or
- Any beneficiary with \$5,000 or more in accumulated paid claims

290.xx: Dementias

291.xx: Alcohol-induced mental disorders

292.xx: Drug psychoses

294.xx: Other organic psychotic conditions (chronic)

295.xx: Schizophrenic disorders

296.xx: Affective psychoses

297.xx Paranoid states

331: Other cerebral degenerations

331.1x–331.2x

331.8x–331.9x

333: Other extrapyramidal disease and abnormal movement disorders

333.4: Huntington's chorea

333.5: Other choreas

333.6: Idiopathic torsion dystonia

333.7: Symptomatic torsion dystonia

333.8: Fragments of torsion dystonia

333.9: Other and unspecified extrapyramidal diseases and abnormal movement disorders

333.90: Unspecified extrapyramidal disease and abnormal movement disorder

333.91: Stiff-man syndrome

333.92: Neuroleptic malignant syndrome

333.93: Benign shuddering attacks

334: Spinocerebellar disease

334.0: Friedreich's ataxia

334.1: Hereditary spastic paraplegia

334.2: Primary cerebellar degeneration

334.3: Other cerebellar ataxia

334.4: Cerebellar ataxia in diseases classified elsewhere

334.8: Other spinocerebellar diseases

334.9: Spinocerebellar disease, unspecified

335: Anterior horn cell disease

335.0: Werdnig–Hoffman disease

335.1: Spinal muscular atrophy

335.10: Spinal muscular atrophy, unspecified

335.11: Kugelberg–Welander disease

335.2: Motor neuron disease

335.20: Amyotrophic lateral sclerosis

335.21: Progressive muscular atrophy

335.22: Progressive bulbar palsy

335.23: Pseudobulbar palsy

335.24: Primary lateral sclerosis

335.29: Other

335.8: Other anterior horn cell diseases

335.9: Anterior horn cell disease, unspecified

336: Other diseases of spinal cord

336.0: Syringomyelia and syringobulbia

336.1: Vascular myelopathies

336.3: Myelopathy in other diseases classified elsewhere

336.8: Other myelopathy

336.9: Unspecified disease of spinal cord
